# Supplementary material for: APE1 and NPM1 protect cancer cells from platinum compounds cytotoxicity and their expression pattern has a prognostic value in TNBC
Source: PubMed Central journal article supplement (PMC6631760; doi:10.1186/s13046-019-1294-9), 2019-07-15

# Supplementary Figure S6

**A**

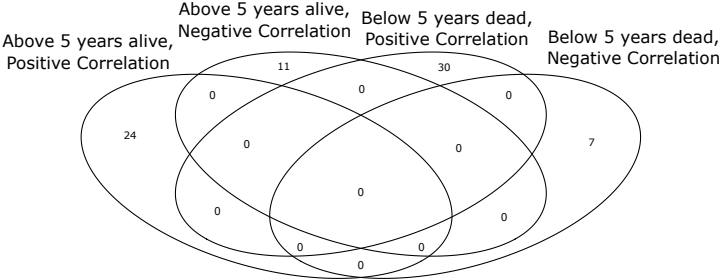

**B**

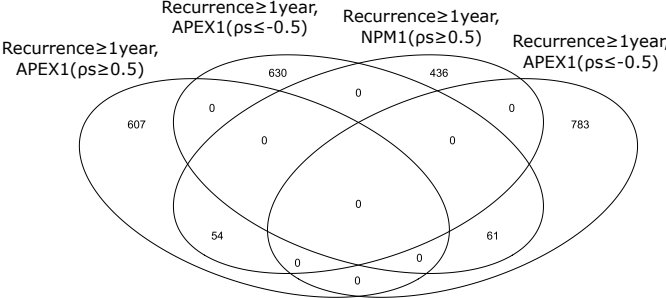

Supplement: 13046_2019_1294_MOESM7_ESM.pdf [file 13046_2019_1294_MOESM7_ESM.pdf]
