# Supplementary material for: APE1 and NPM1 protect cancer cells from platinum compounds cytotoxicity and their expression pattern has a prognostic value in TNBC
Source: Springer Nature journal article supplement (doi:10.1186/s13046-019-1294-9), 2019-07-15

Supplementary Figure S2

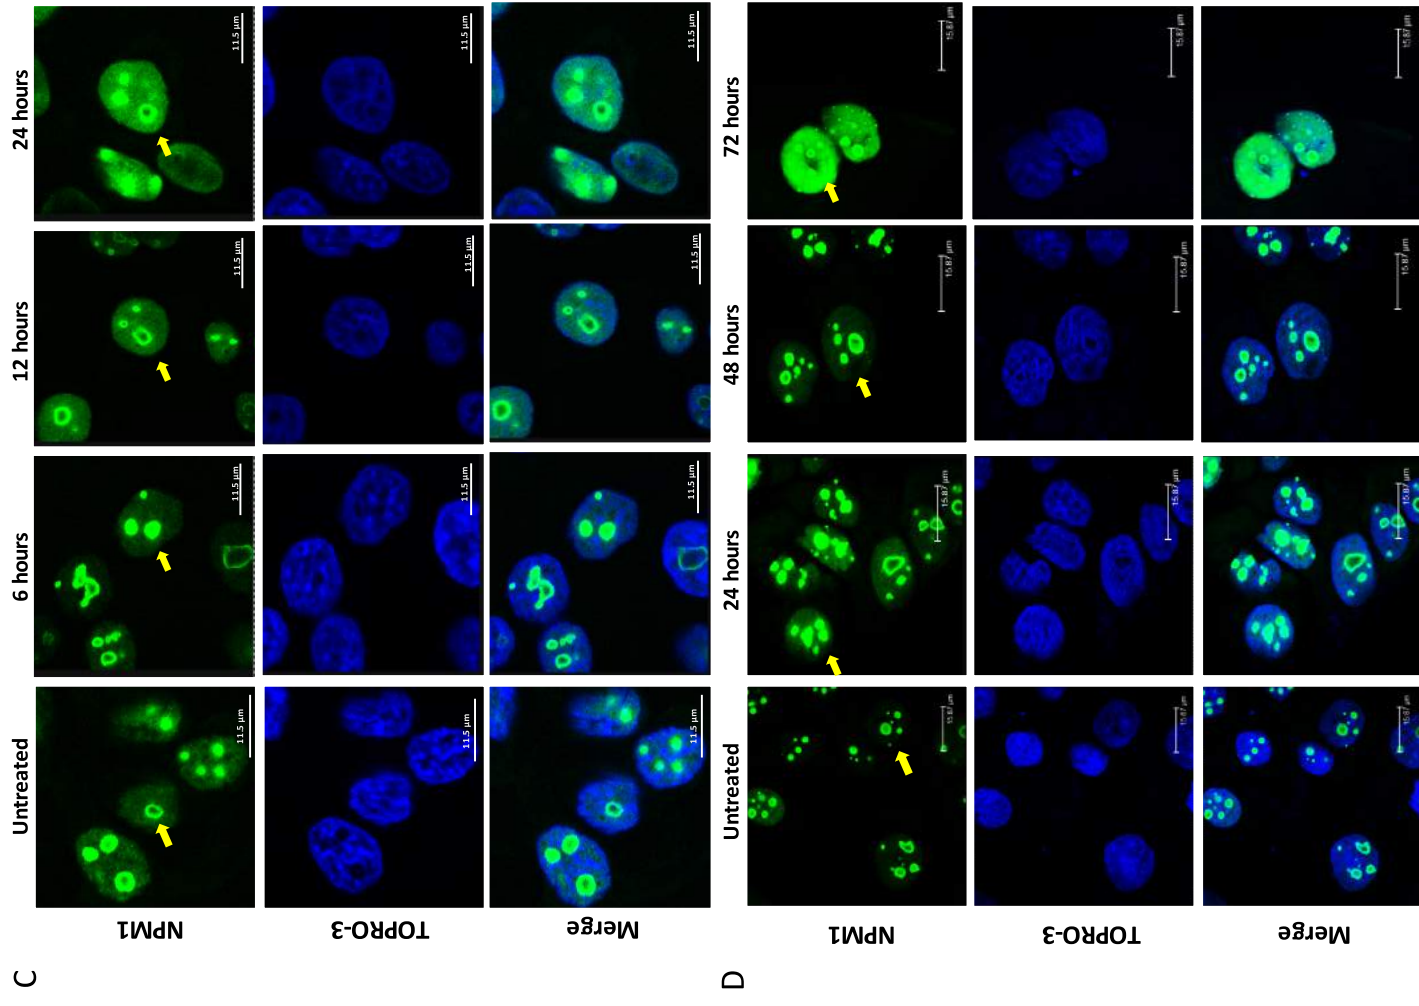

Supplementary Figure S2

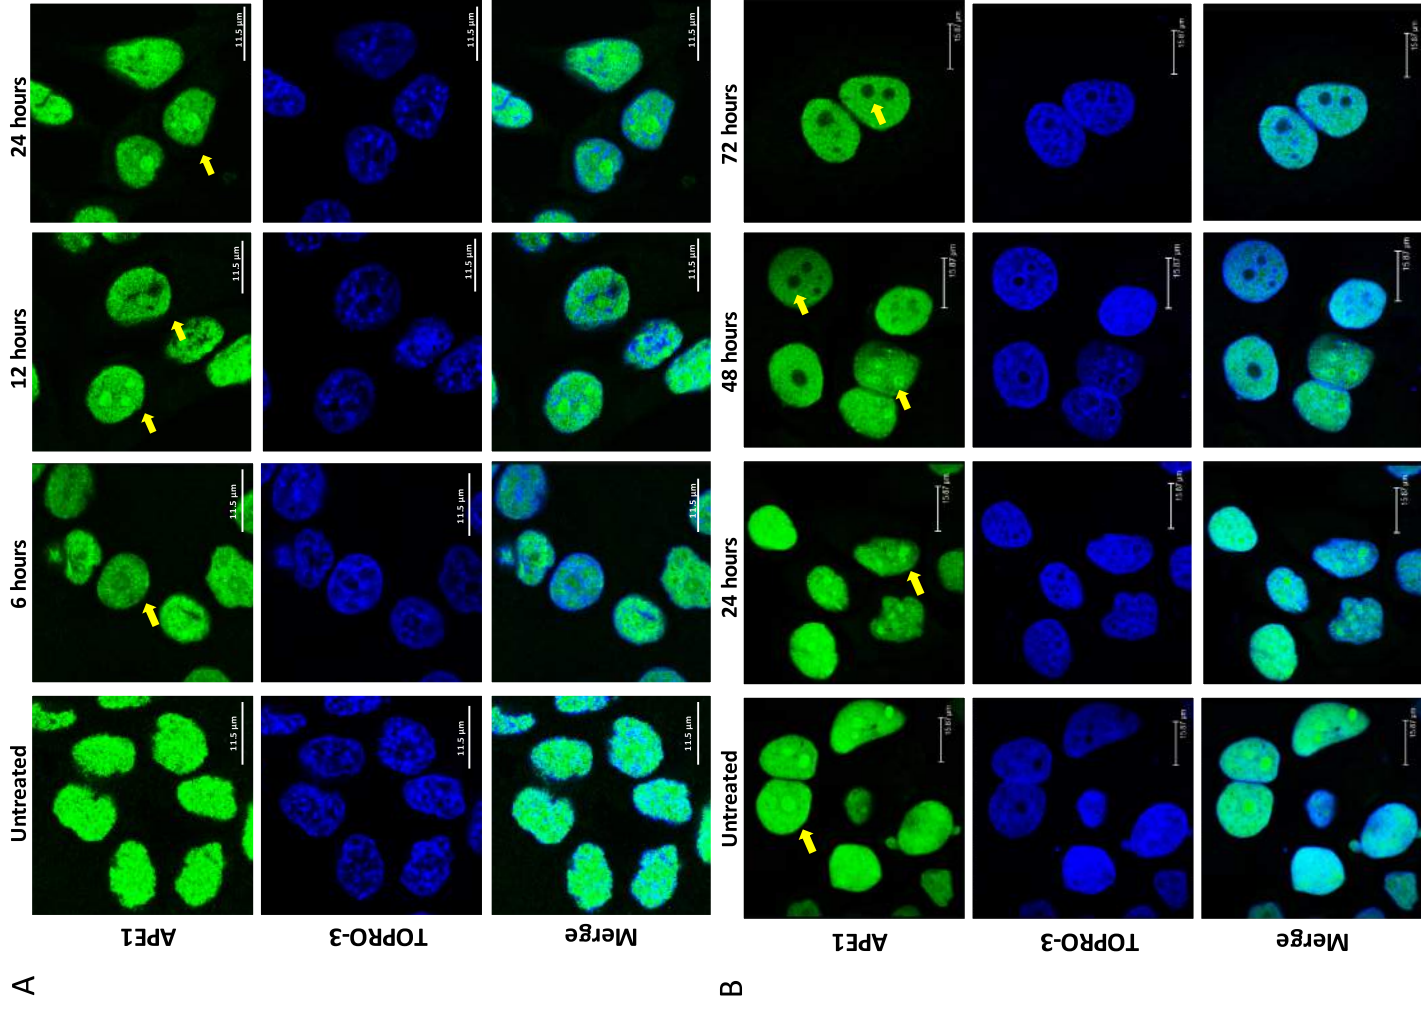

Supplement: MOESM3 [file 16929820]
