# Supplementary material for: APE1 and NPM1 protect cancer cells from platinum compounds cytotoxicity and their expression pattern has a prognostic value in TNBC
Source: Springer Nature journal article supplement (doi:10.1186/s13046-019-1294-9), 2019-07-15

# Supplementary Figure S3

**A**

|   |      |       |      |                           |
|---|------|-------|------|---------------------------|
| - | 1.56 | 3.125 | 6.25 | [CDDP] ( $\mu\text{M}$ )  |
| 6 | 6    | 6     | 6    | Time of treatment (hours) |

|   |   |    |    |                                |
|---|---|----|----|--------------------------------|
| - | + | +  | +  | [CDDP] ( $3.125 \mu\text{M}$ ) |
| - | 6 | 12 | 24 | Time of treatment (hours)      |

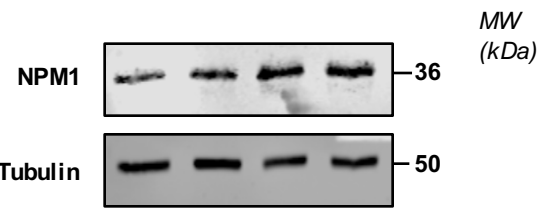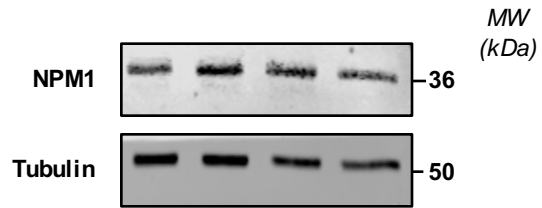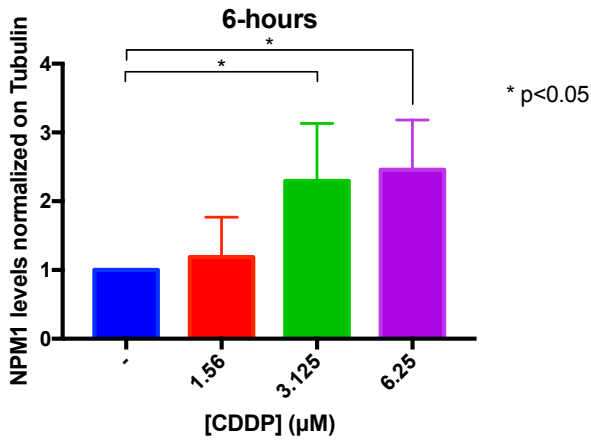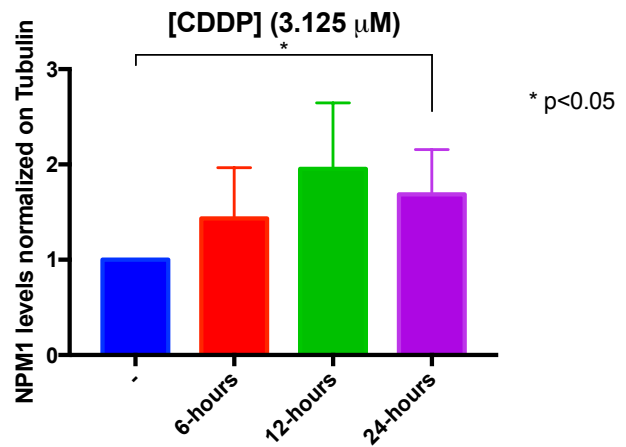

**B**

|    |      |      |    |      |      |      |                           |
|----|------|------|----|------|------|------|---------------------------|
| -  | 6.25 | 12.5 | 25 | 12.5 | 12.5 | 12.5 | [CBDCA] ( $\mu\text{M}$ ) |
| 72 | 24   | 24   | 24 | 24   | 48   | 72   | Time of treatment (hours) |

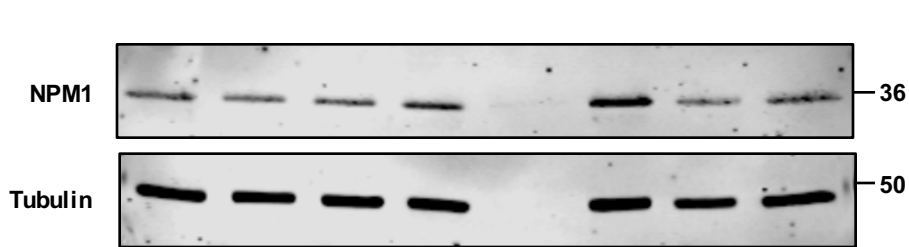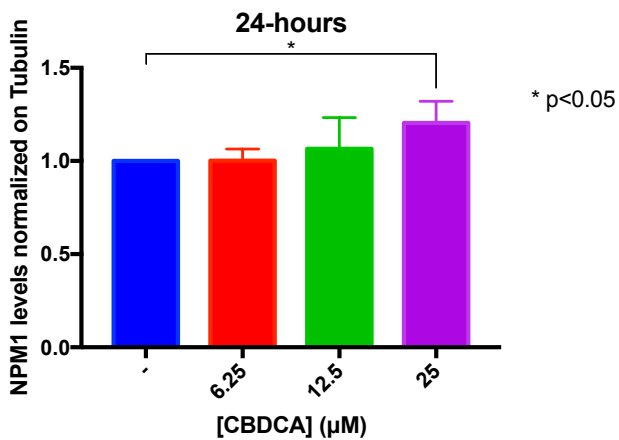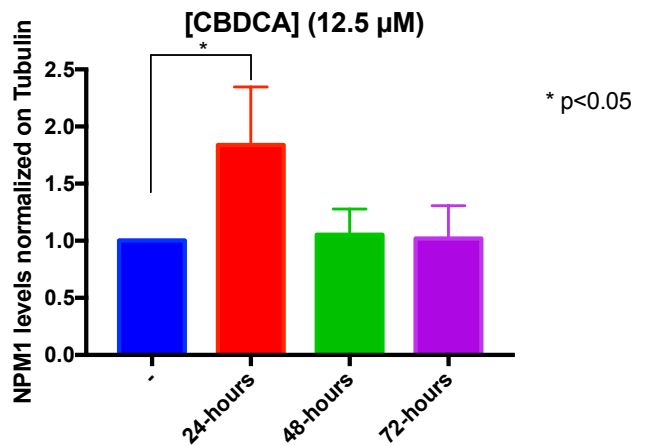

Supplement: MOESM4 [file 16929820]
